# Supplementary material
Source: PubMed Central journal article supplement (PMC2643924)
Supplement: 90597.2008_1.pdf [file 90597.2008_1.pdf]

## Supplemental Figure 1

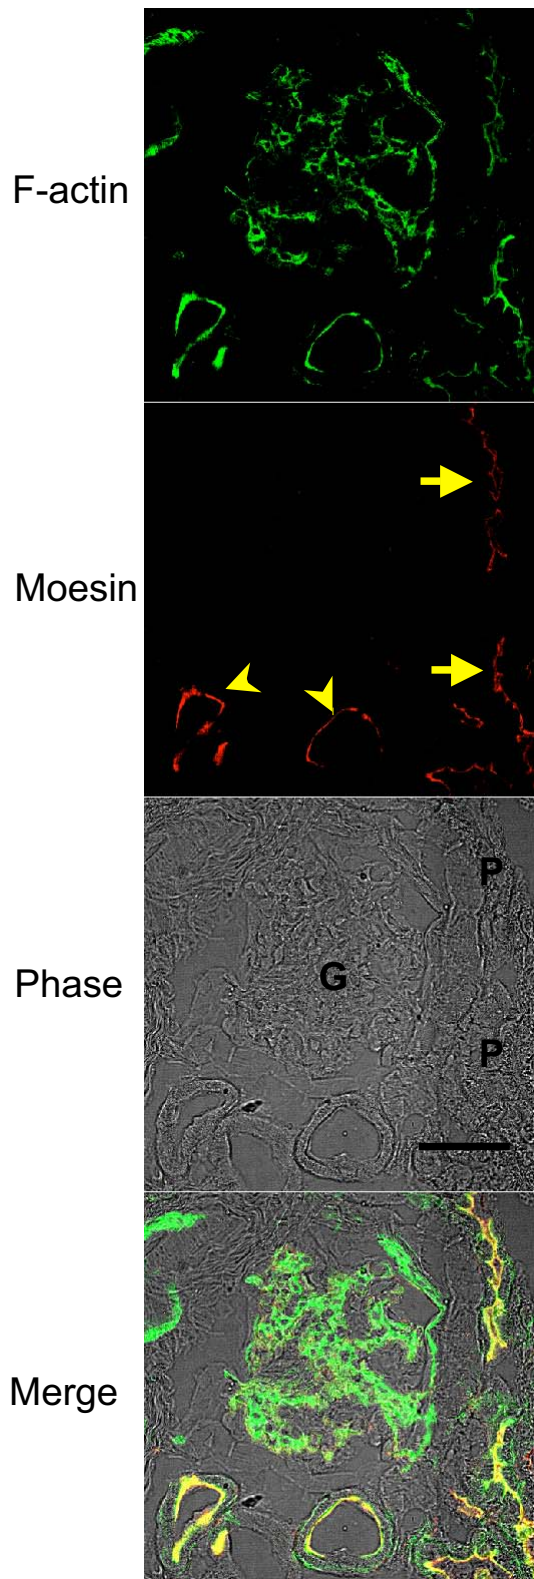

Rabbit kidney was excised immediately after euthanasia. Kidney was then cut into cubes of about 1 mm<sup>3</sup> for fixation with 3.7% paraformaldehyde. After fixation, kidney tissue was immersed in 30% sucrose and then frozen in Optimal Cutting Temperature media (Sakura Finetek USA, Inc., Torrance, CA). 15 μm sections were prepared from these frozen blocks with a cryostat (Leitz 1720 digital Kryostat, Leitz, Germany).

For immunostaining, these sections were rehydrated in PBS, permeabilized with 0.5% Triton X-100 in PBS with 1% BSA. The sections were then incubated with mouse anti-moesin, Alexa 555 conjugated goat anti-mouse and FITC conjugated phalloidin, sequentially.

Images were collected with a Zeiss LSM 510 meta confocal microscope .

Arrows point to the moesin staining of the brushborder membranes while arrowheads point to the moesin staining of the blood vessels.

G: glomerulus; P: proximal tubule; bar = 50 μm.
